# Supplementary material for: Crosstalk Between the Immune System and Plant-Derived Nanovesicles: A Study of Allergen Transporting
Source: Front Bioeng Biotechnol. 2021 Nov 26;9:760730. doi: 10.3389/fbioe.2021.760730 (PMC8662998; doi:10.3389/fbioe.2021.760730)
Supplement: Supplementary file 4 [file Table4.XLSX]

## Sheet: Table S4
Table S4: Results of BLAST search of all identified proteins in microvesicles (MVs), nanovesicles (NVs), and gradient ultracentrifugation separated fraction of nanovesicles (DGUC-NVs) samples against the allergen database COMPARE.
Fra a1
NCBI access number (F. vesca) of the identified protein	NCBI description	UniProt Sequence homologe identified by BLAST search	e-Value	sim mean	average intensity TPE	average intensity MVs	average intensity NVs	average intensity DGUC-NVs	fold change MVs	fold change NVs	fold change DGUC-NVs
gi|764564910|ref|XP_011461765.1|	major allergen Mal d 1-like	FRA13_FRAANMajor strawberry allergen Fra a 1-3 OS=Fragaria ananassa OX=3747 GN=FRAA3 PE=1 SV=1	1.69798e-83	84.26
gi|470125420|ref|XP_004298700.1|	major allergen Pru ar 1-like	FRA18_FRAANMajor strawberry allergen Fra a 1.08 OS=Fragaria ananassa OX=3747 GN=Fra a 1.08 PE=1 SV=1	3.68244e-102	89.89
gi|470121673|ref|XP_004296886.1|	major allergen Pru av 1-like [Fragaria vesca subsp. vesca]	FRA13_FRAANMajor strawberry allergen Fra a 1-3 OS=Fragaria ananassa OX=3747 GN=FRAA3 PE=1 SV=1	9.3141e-113	91.85
gi|470121687|ref|XP_004296893.1|	major allergen Pru av 1-like	FRA15_FRAANMajor strawberry allergen Fra a 1.05 OS=Fragaria ananassa OX=3747 GN=Fra a 1.05 PE=1 SV=1	3.606e-115	92.15
gi|470121679|ref|XP_004296889.1|	major allergen Pru ar 1-like	FRA15_FRAANMajor strawberry allergen Fra a 1.05 OS=Fragaria ananassa OX=3747 GN=Fra a 1.05 PE=1 SV=1	4.91228e-92	85.71
gi|470121651|ref|XP_004296876.1|	major allergen Pru ar 1-like	FRA15_FRAANMajor strawberry allergen Fra a 1.05 OS=Fragaria ananassa OX=3747 GN=Fra a 1.05 PE=1 SV=1	6.78655e-117	92.74
gi|470121668|ref|XP_004296884.1|	major allergen Pru ar 1-like [Fragaria vesca subsp. vesca]	FRA13_FRAANMajor strawberry allergen Fra a 1-3 OS=Fragaria ananassa OX=3747 GN=FRAA3 PE=1 SV=1	6.28925e-47	62.28
gi|470123278|ref|XP_004297655.1|	MLP-like protein 423 [Fragaria vesca subsp. vesca]	FRA14_FRAANMajor strawberry allergen Fra a 1.04 OS=Fragaria ananassa OX=3747 GN=Fra a 1.04 PE=1 SV=1	2.1368e-12	50.79
gi|470121649|ref|XP_004296875.1|	major allergen Pru ar 1-like [Fragaria vesca subsp. vesca]	FRA18_FRAANMajor strawberry allergen Fra a 1.08 OS=Fragaria ananassa OX=3747 GN=Fra a 1.08 PE=1 SV=1	3.80152e-116	91.32
gi|470121675|ref|XP_004296887.1|	major allergen Pru av 1-like	FRA1A_FRAANMajor strawberry allergen Fra a 1-A OS=Fragaria ananassa OX=3747 GN=FRAA1A.1 PE=1 SV=3	3.18931e-116	90.73	9.66844e+08	8.71153e+08	1.37379e+09	1.35453e+09	0.167023	0.485347	1.02414
gi|470122714|ref|XP_004297384.1|	kirola-like [Fragaria vesca subsp. vesca]	FRA1B_FRAANMajor strawberry allergen Fra a 1-B OS=Fragaria ananassa OX=3747 GN=FRAA1B.1 PE=3 SV=1	2.08228e-07	51.02
Fra a 3
NCBI access number (F. vesca) of the identified protein	NCBI description	UniProt Sequence homologe identified by BLAST search	e-Value	sim mean	average intensity TPE	average intensity MVs	average intensity NVs	average intensity DGUC-NVs	fold change MVs	fold change NVs	fold change DGUC-NVs
gi|470123578|ref|XP_004297800.1|	non-specific lipid-transfer protein 4 [Fragaria vesca subsp. vesca]	Q4PLU0_FRAANNon-specific lipid-transfer protein OS=Fragaria ananassa OX=3747 GN=LTP1 PE=2 SV=1	0.000975349	50.7
gi|470129610|ref|XP_004300702.1|	non-specific lipid-transfer protein-like protein At5g64080 [Fragaria vesca subsp. vesca]	Q4PLT9_FRAANNon-specific lipid-transfer protein OS=Fragaria ananassa OX=3747 GN=LTP2 PE=2 SV=1	5.78405e-06	45.12
gi|764599752|ref|XP_011466421.1|	non-specific lipid-transfer protein 1-like isoform X2 [Fragaria vesca subsp. vesca]	Q4PLT8_FRAANNon-specific lipid-transfer protein OS=Fragaria ananassa OX=3747 GN=LTP3 PE=2 SV=1	1.79253e-67	91.66
Fra a 4
NCBI access number (F. vesca) of the identified protein	NCBI description	UniProt Sequence homologe identified by BLAST search	e-Value	sim mean	average intensity TPE	average intensity MVs	average intensity NVs	average intensity DGUC-NVs	fold change MVs	fold change NVs	fold change DGUC-NVs
gi|470109748|ref|XP_004291152.1|	Profilin	PROF_FRAANProfilin OS=Fragaria ananassa OX=3747 PE=1 SV=1	1.61183e-82	92.37
gi|470102086|ref|XP_004287490.1|	Profilin [Fragaria vesca subsp. vesca]	PROF_FRAANProfilin OS=Fragaria ananassa OX=3747 PE=1 SV=1	7.5952e-96	100	1.69296e+09	7.06785e+08	2.56338e+09	1.53352e+09	0.417484	1.51414	0.905821
